# Supplementary material
Source: MDPI journal article supplement (https://www.mdpi.com/2571-9408/5/4/213)
Supplement: s1 [file s1]

**Table S1.** Band assignment of cellulose and of correlated compounds (water, lignin, pectin, hemicellulose, wax).  
\*softwood only; \*\*hardwood only; v=stretching;  $\delta_{ip}$ =in plane bending;  $\delta_{op}$ =out of plane bending

| Cellulose -<br>$\tilde{\nu}$ (cm <sup>-1</sup> ) | Lignin -<br>$\tilde{\nu}$ (cm <sup>-1</sup> ) | Wax -<br>$\tilde{\nu}$ (cm <sup>-1</sup> ) | Hemicellulose<br>- $\tilde{\nu}$ (cm <sup>-1</sup> ) | Pectin -<br>$\tilde{\nu}$ (cm <sup>-1</sup> ) | Assignations                                                                                                     |
|--------------------------------------------------|-----------------------------------------------|--------------------------------------------|------------------------------------------------------|-----------------------------------------------|------------------------------------------------------------------------------------------------------------------|
|                                                  |                                               |                                            |                                                      | 2940                                          | v CH[74]                                                                                                         |
|                                                  | 2930                                          |                                            |                                                      |                                               | v CH[76]                                                                                                         |
| 2900                                             |                                               |                                            |                                                      |                                               | v CH[57,76,79]                                                                                                   |
|                                                  |                                               | 2917,<br>2849                              |                                                      |                                               | v(CH <sub>2</sub> )[8,55]                                                                                        |
|                                                  |                                               |                                            |                                                      | 1760-<br>40                                   | v C=O of alkyl ester[7,74]                                                                                       |
|                                                  | 1740                                          |                                            |                                                      |                                               | v C=O [77,78]                                                                                                    |
|                                                  |                                               |                                            | 1732                                                 |                                               | v C=O[7]                                                                                                         |
|                                                  |                                               | 1732                                       |                                                      |                                               | v C=O of ester[8,55]                                                                                             |
|                                                  | 1717                                          |                                            |                                                      |                                               | v C=O [76]                                                                                                       |
|                                                  |                                               | 1707,<br>1686                              |                                                      |                                               | v (C=O...H)[8,80]                                                                                                |
|                                                  | 1640                                          |                                            |                                                      |                                               | v C=O [76–78]                                                                                                    |
| 1643-<br>34                                      |                                               |                                            | 1645                                                 | 1645                                          | $\delta$ OH of adsorbed water[50,74–76]                                                                          |
|                                                  | 1606                                          |                                            |                                                      |                                               | v ring and v C=O[76]                                                                                             |
|                                                  |                                               |                                            |                                                      | 1600                                          | v COO <sup>-</sup> (pectate)[7,74]                                                                               |
|                                                  | 1594**                                        |                                            |                                                      |                                               | v C=O conjugated to aromatic ring[77]                                                                            |
|                                                  | 1507                                          |                                            |                                                      |                                               | v ring[76,77]                                                                                                    |
|                                                  |                                               | 1470-<br>63                                |                                                      |                                               | $\delta$ CH <sub>2</sub> [8,80–82]                                                                               |
| 1472                                             |                                               |                                            |                                                      |                                               | $\delta$ CH <sub>2</sub> [75]; $\delta$ O-H[79]                                                                  |
|                                                  |                                               |                                            | 1474                                                 |                                               | [7]                                                                                                              |
|                                                  | 1463                                          |                                            |                                                      |                                               | $\delta$ CH <sub>2</sub> [76,77]                                                                                 |
| 1454                                             |                                               |                                            |                                                      |                                               | $\delta_{ip}$ O-H in alcohol groups [59] ; $\delta_{op}$ OH[75]; $\delta$ O-H[79]                                |
|                                                  |                                               |                                            |                                                      | 1440                                          | v C-H <sub>3</sub> of methyl ester[7]                                                                            |
|                                                  |                                               | 1438                                       |                                                      |                                               | $\delta$ CH <sub>2</sub> [80]                                                                                    |
| 1427                                             |                                               |                                            |                                                      |                                               | $\delta_{ip}$ O-H in alcohol groups [59]; $\delta$ CH <sub>2</sub> [57,75,79]                                    |
|                                                  | 1425                                          |                                            |                                                      |                                               | v C-H, $\delta_{ip}$ C-H and ring[76,77]                                                                         |
|                                                  |                                               |                                            |                                                      | 1403                                          | v, $\delta$ (C–OH) <sub>COOH</sub> [74]                                                                          |
|                                                  |                                               | 1378                                       |                                                      |                                               | $\delta$ CH <sub>3</sub> [80]; $\delta$ O-H of carboxyl group[80]                                                |
|                                                  | 1375                                          |                                            |                                                      |                                               | v C-H and v OH in phenol[77]                                                                                     |
| 1370                                             |                                               |                                            | 1370                                                 |                                               | $\delta$ C-H[7,57,75,76,79]                                                                                      |
| 1361                                             |                                               |                                            |                                                      |                                               | $\delta$ C-H[75,79]                                                                                              |
| 1336                                             |                                               |                                            |                                                      |                                               | $\delta_{ip}$ O-H in alcohol groups [59,75,76]; $\delta$ O-H[79]                                                 |
|                                                  |                                               |                                            |                                                      | 1330                                          | $\delta$ C-H[74]; $\delta$ OH in pyranose ring[7]                                                                |
|                                                  | 1317**                                        |                                            |                                                      |                                               | $\delta$ CH <sub>2</sub> in syringil group[76,77]                                                                |
| 1315                                             |                                               |                                            |                                                      |                                               | $\delta_{ip}$ OH in alcohol groups [59]; $\delta_{ip}$ CH <sub>2</sub> [75,76]; $\delta$ CH <sub>2</sub> [57,79] |
|                                                  |                                               | 1305                                       |                                                      |                                               | v C-O of alcoholic group[80]                                                                                     |
|                                                  |                                               | 1292                                       |                                                      |                                               | $\delta$ C-H <sub>2</sub> [80]                                                                                   |
| 1280                                             |                                               |                                            |                                                      |                                               | $\delta$ CH[57,75]                                                                                               |
|                                                  | 1270*                                         |                                            |                                                      |                                               | v guaiacyl ring and v C=O [76,77]                                                                                |

| Cellulose -<br>$\tilde{\nu}$ (cm <sup>-1</sup> ) | Lignin -<br>$\tilde{\nu}$ (cm <sup>-1</sup> ) | Wax -<br>$\tilde{\nu}$ (cm <sup>-1</sup> ) | Hemicellulose<br>- $\tilde{\nu}$ (cm <sup>-1</sup> ) | Pectin -<br>$\tilde{\nu}$ (cm <sup>-1</sup> ) | Assignations                                                                                                            |
|--------------------------------------------------|-----------------------------------------------|--------------------------------------------|------------------------------------------------------|-----------------------------------------------|-------------------------------------------------------------------------------------------------------------------------|
|                                                  |                                               |                                            | 1247                                                 |                                               | $\nu$ C-O[84]                                                                                                           |
|                                                  | 1233**                                        |                                            |                                                      |                                               | $\nu$ C-C, C-O e C=O[77]                                                                                                |
| 1235                                             |                                               |                                            |                                                      |                                               | $\delta$ O-H[79]; $\delta_{ip}$ C-OH[57]                                                                                |
|                                                  |                                               |                                            |                                                      | 1230                                          | $\nu$ C=O[7]; ( $\delta$ OH) <sub>COOH</sub> [74]                                                                       |
|                                                  | 1214                                          |                                            |                                                      |                                               | $\nu$ C=O of guaiacyl ring [76,77]                                                                                      |
| 1202                                             |                                               |                                            |                                                      |                                               | $\nu$ glucose ring[79]; $\delta_{ip}$ OH[57,75,76]                                                                      |
|                                                  | 1165                                          |                                            |                                                      |                                               | $\nu$ C-O-C in pyranose rings, $\nu$ C=O[77]                                                                            |
|                                                  |                                               |                                            |                                                      | 1164                                          | $\nu$ C-O-C at glycosidic linkage [7,74], $\nu$ ring[74]                                                                |
|                                                  |                                               |                                            | 1164,52                                              |                                               | $\nu$ C-O-C at glycosidic linkage[7]                                                                                    |
| 1160                                             |                                               |                                            |                                                      |                                               | $\nu$ C-O-C at glycosidic linkage[57,75,76,79]                                                                          |
|                                                  |                                               | 1155                                       |                                                      |                                               | $\nu$ C-O of alcoholic group[80]                                                                                        |
|                                                  |                                               |                                            |                                                      | 1144                                          | $\nu$ C-O-C at glycosidic linkage[7]                                                                                    |
|                                                  | 1140                                          |                                            |                                                      |                                               | $\nu$ CH in guaiacyl and $\nu$ CH in syringyl group[76]                                                                 |
|                                                  |                                               |                                            |                                                      | 1119                                          | $\nu$ C-C and $\nu$ C-O[74]                                                                                             |
| 1105                                             |                                               |                                            |                                                      |                                               | $\nu$ glucose ring[75,76]                                                                                               |
| 1125                                             |                                               |                                            |                                                      |                                               | $\nu$ C-O and ring[79]                                                                                                  |
|                                                  |                                               |                                            |                                                      | 1097                                          | $\nu$ C-O[7,74] and ring[7]                                                                                             |
|                                                  |                                               | 1093                                       |                                                      |                                               | $\nu$ ring[80]                                                                                                          |
|                                                  | 1086*                                         |                                            |                                                      |                                               | $\nu$ C=O of secondary alcohols[76]                                                                                     |
| 1075                                             |                                               |                                            |                                                      |                                               | $\nu$ C-O and ring[79]; $\nu$ C-O-C [59]                                                                                |
|                                                  |                                               |                                            | 1065                                                 |                                               | $\nu$ C-O and $\nu$ C-C[7]                                                                                              |
| 1055                                             |                                               |                                            |                                                      |                                               | $\nu$ C-O and ring[79]; $\nu$ C-OH in secondary alcohols[59,75,76]                                                      |
|                                                  |                                               |                                            | 1035                                                 |                                               | $\nu$ C-O and $\nu$ C-C[7]                                                                                              |
|                                                  |                                               |                                            |                                                      | 1034                                          | $\nu$ C-C and $\nu$ C-O[74]                                                                                             |
|                                                  | 1030                                          |                                            |                                                      |                                               | $\nu$ C-O of primary alcohol, $\nu$ C-H of guaiacyl group[76]                                                           |
| 1030                                             |                                               |                                            |                                                      |                                               | $\nu$ C-O[57,79] ; $\nu$ glucose ring[79]; $\nu$ C-OH in primary alcohols (primary conformation)[59,75,76]              |
|                                                  |                                               | 1027                                       |                                                      |                                               | $\nu$ C-O of alcoholic group[80]                                                                                        |
|                                                  |                                               |                                            | 1027,13                                              |                                               | $\nu$ C-O and $\nu$ C-C[7]                                                                                              |
|                                                  |                                               |                                            |                                                      | 1014                                          | $\nu$ C-O, $\nu$ ring and $\nu$ C-C[7]                                                                                  |
| 1000                                             |                                               |                                            |                                                      |                                               | $\nu$ C-OH in primary alcohols (secondary conformation)[59,75,79]; $\nu$ glucose ring[79]; $\nu$ C-O-C (glycosidic)[83] |
| 984                                              |                                               |                                            |                                                      |                                               | $\nu$ C-OH[57,75] ; $\nu$ C-O-C at glycosidic linkage[83]                                                               |
|                                                  |                                               |                                            | 983                                                  |                                               | [7]                                                                                                                     |
|                                                  |                                               |                                            |                                                      | 970                                           | [7]                                                                                                                     |
|                                                  |                                               |                                            |                                                      | 954                                           | $\delta$ C-O[7,74]                                                                                                      |
|                                                  |                                               |                                            | 939                                                  |                                               | $\nu$ ring[7]                                                                                                           |
|                                                  |                                               |                                            |                                                      | 914                                           | $\nu$ ring[7]                                                                                                           |
| 897                                              |                                               |                                            |                                                      |                                               | $\nu$ C-O-C (glycosidic)[57]; $\nu$ glucose ring[75,76]; $\delta$ C-H[76,79]                                            |
|                                                  |                                               | 890                                        |                                                      |                                               | $\delta$ CH <sub>2</sub> [80]                                                                                           |
|                                                  |                                               |                                            | 890,70                                               |                                               | $\delta$ C-H[7]                                                                                                         |
|                                                  | 912-866                                       |                                            |                                                      |                                               | $\delta_{op}$ CH <sub>2</sub> [76]                                                                                      |

| Cellulose -<br>$\tilde{\nu}$ (cm <sup>-1</sup> ) | Lignin -<br>$\tilde{\nu}$ (cm <sup>-1</sup> ) | Wax -<br>$\tilde{\nu}$ (cm <sup>-1</sup> ) | Hemicellulose<br>- $\tilde{\nu}$ (cm <sup>-1</sup> ) | Pectin -<br>$\tilde{\nu}$ (cm <sup>-1</sup> ) | Assignations                                    |
|--------------------------------------------------|-----------------------------------------------|--------------------------------------------|------------------------------------------------------|-----------------------------------------------|-------------------------------------------------|
|                                                  |                                               |                                            |                                                      | 831                                           | v ring [7]                                      |
|                                                  |                                               |                                            | 807                                                  |                                               | v ring [7]                                      |
|                                                  |                                               | 730-<br>720                                |                                                      |                                               | $\delta$ CH <sub>2</sub> [8,80,82]              |
| 700,<br>662                                      |                                               |                                            |                                                      |                                               | $\delta_{op}$ OH in COH alcoholic groups[59,75] |
|                                                  |                                               | 668                                        |                                                      |                                               | $\delta_{op}$ ring[80]                          |

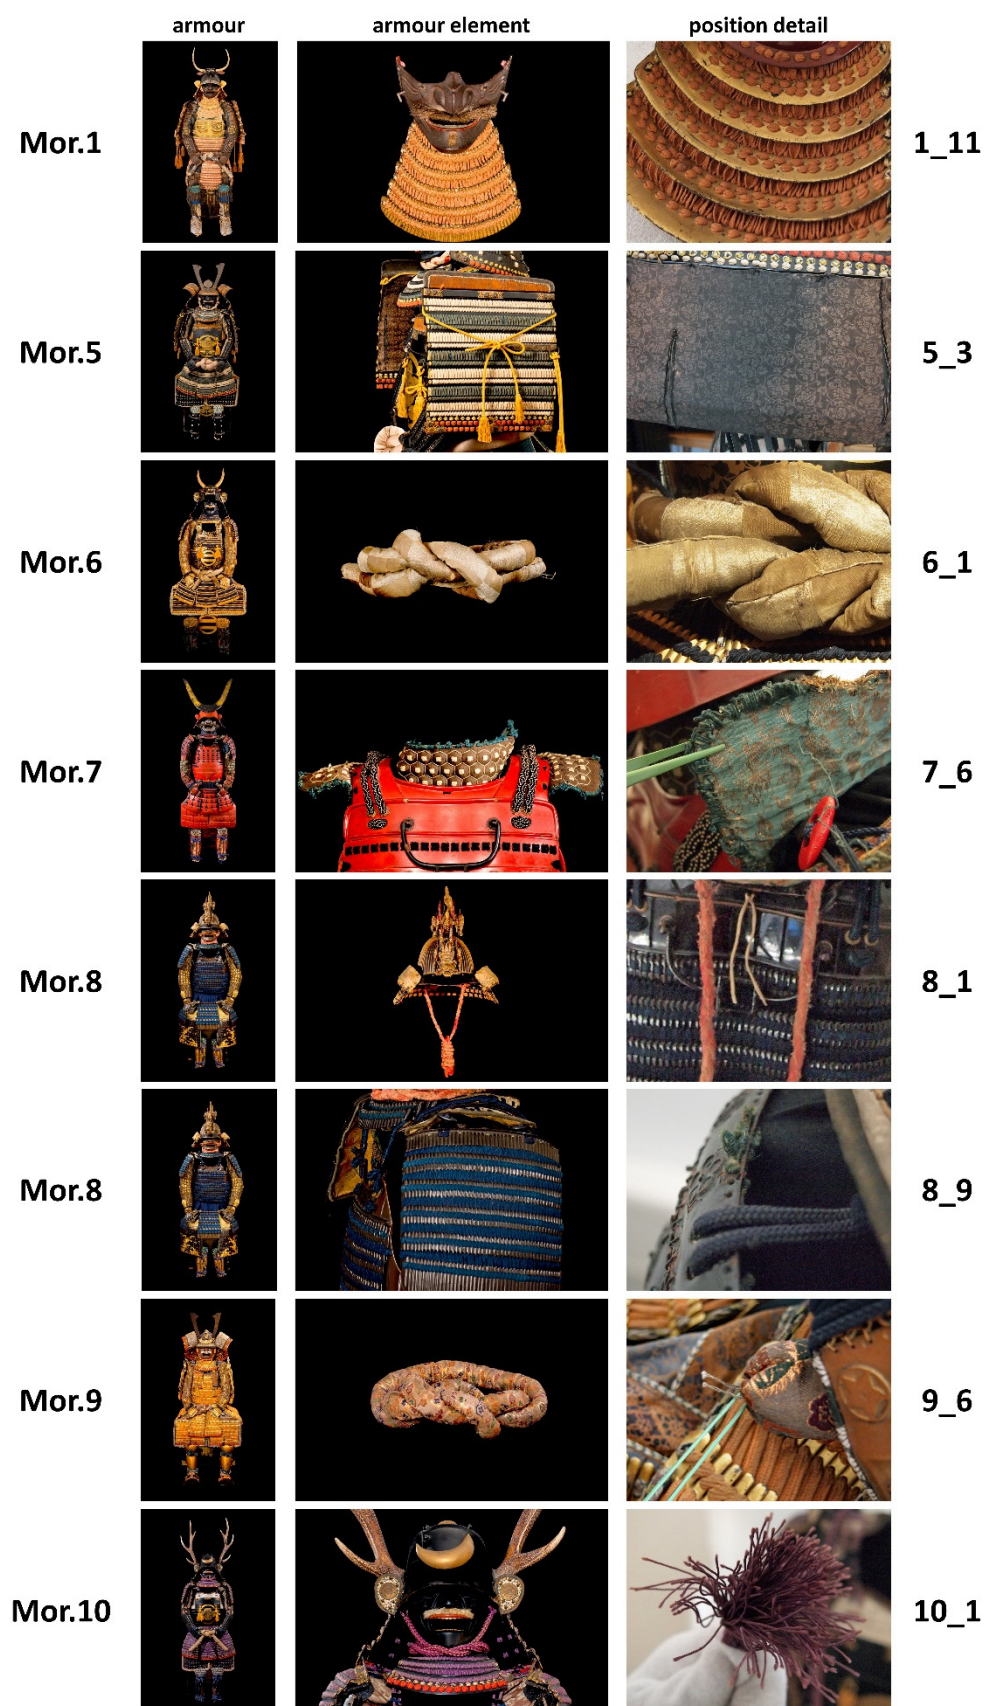

Figure S1. The pictures of the whole historical objects.

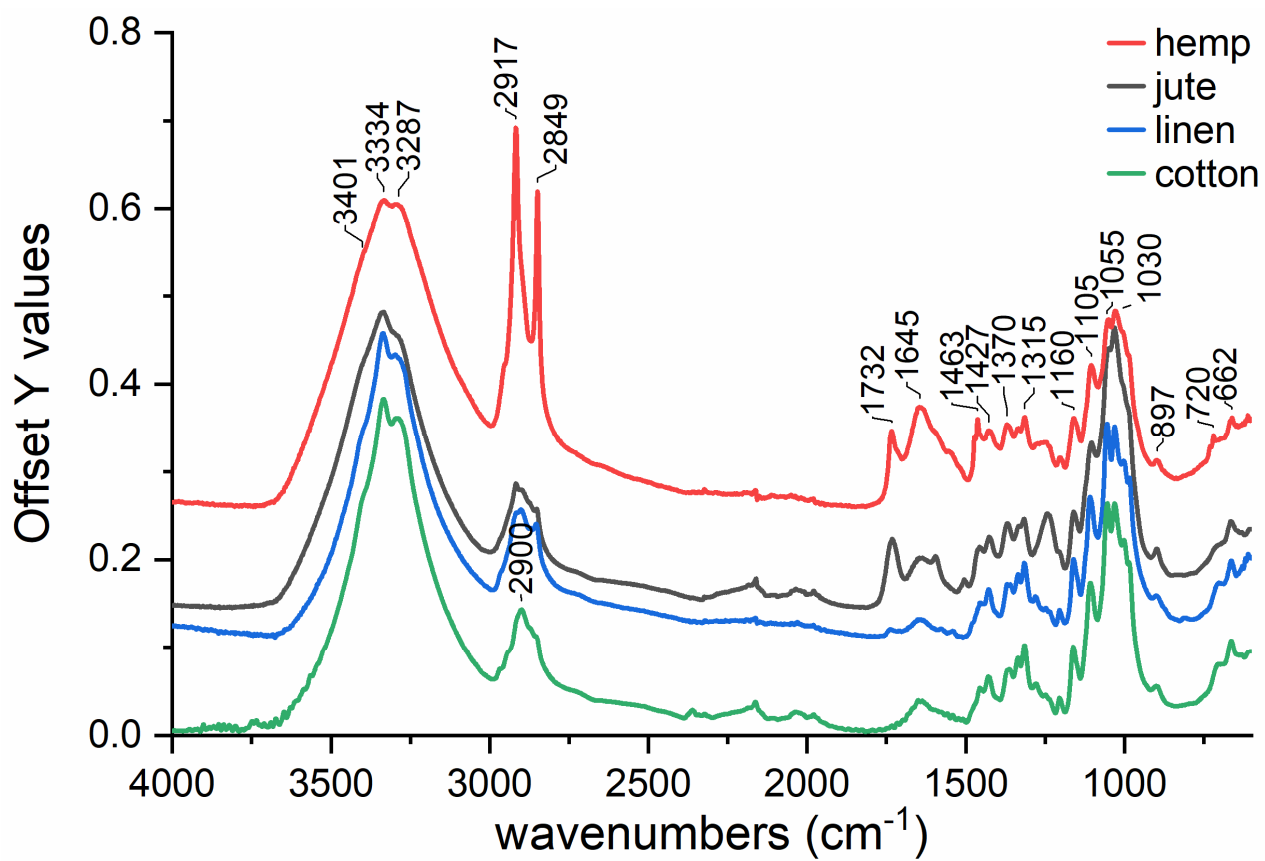

Figure S2. Whole ATR-FTIR spectra of reference materials of jute, hemp, flax (linen), and cotton.

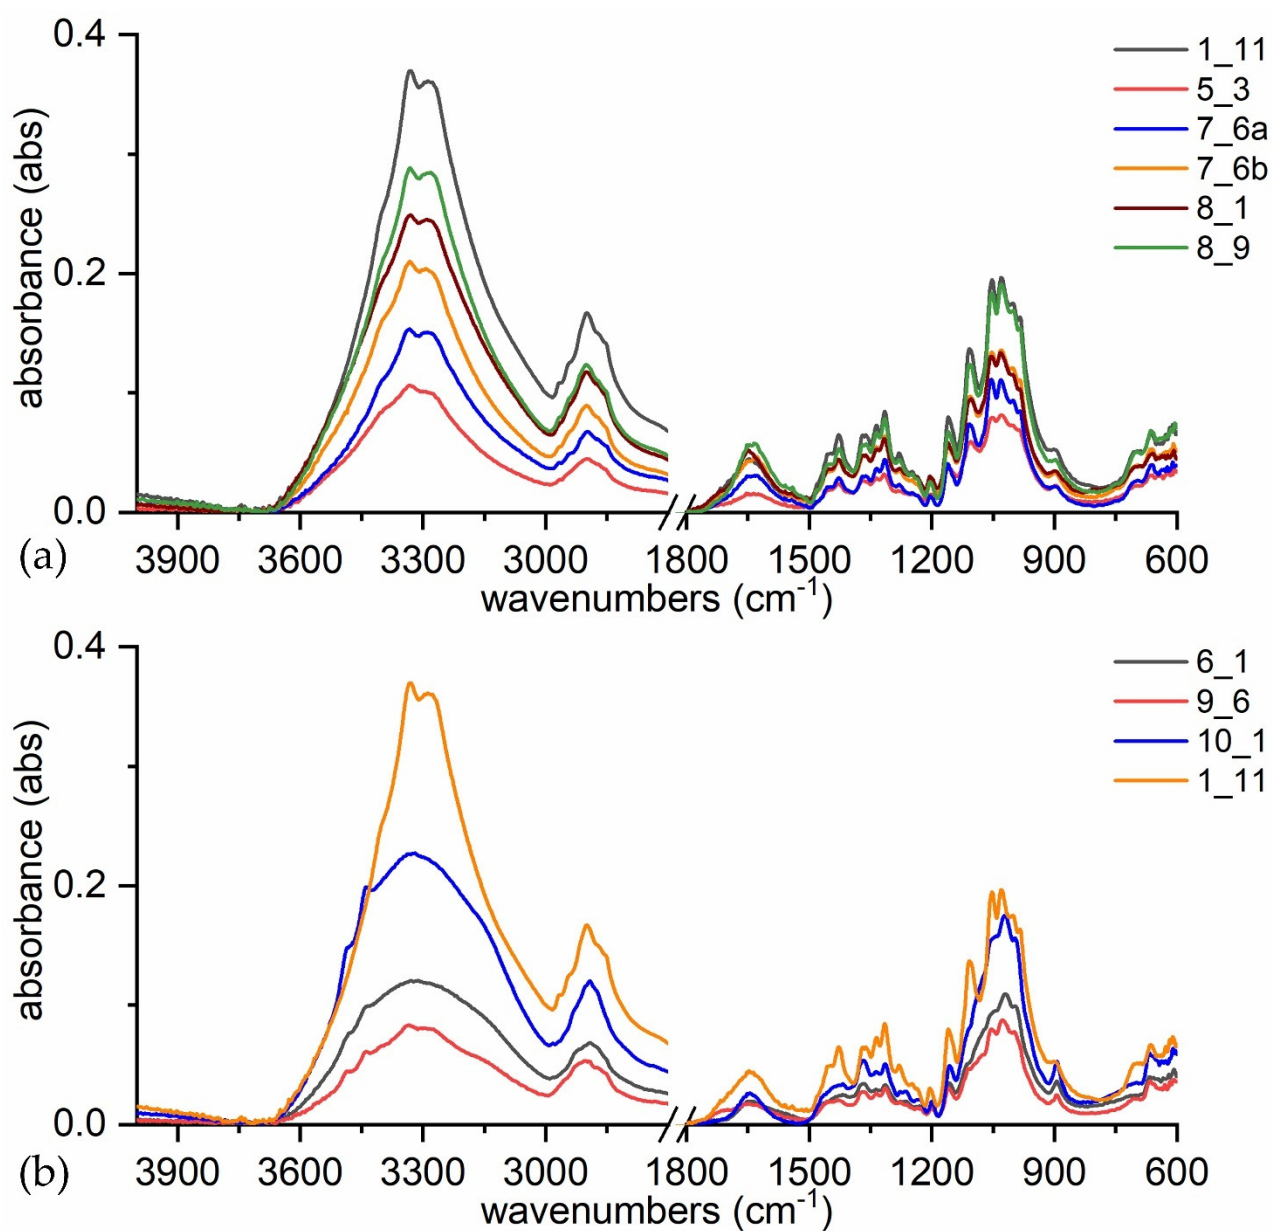

Figure S3. ATR-FTIR spectra of historical samples.
